# Supplementary material for: CO oxidation by the atomic oxygen on silver clusters: structurally dependent mechanisms generating free or chemically bonded CO2
Source: Royal Society of Chemistry journal article supplement (doi:10.1039/c6cp06741g), 2016-11-17

Fig. S1 Linear fitting of  $-\ln(I/I_0)$  vs CO flows in the kinetic measurements of reactions between  $\text{Ag}_n\text{O}^-$  ( $n = 1-8$ ) and CO at 150 K. The  $I$  and  $I_0$  stand for the intensities of  $\text{Ag}_n\text{O}^-$  with and without CO, respectively. Because the intensity of certain  $\text{Ag}_n\text{O}^-$  from the cluster source was not constant during a series of measurements, we always took one spectrum without CO to get the instant  $I_0$  immediately after the experiment at a defined CO flow. The obtained slopes, their uncertainties, and the coefficients of determination ( $R^2$ ) in linear fitting were indicated. The mass spectra on the right column qualitatively show the disappearing of  $\text{Ag}_n\text{O}^-$  and the generation of  $\text{Ag}_n^-$  or  $\text{Ag}_n\text{CO}_2^-$ .

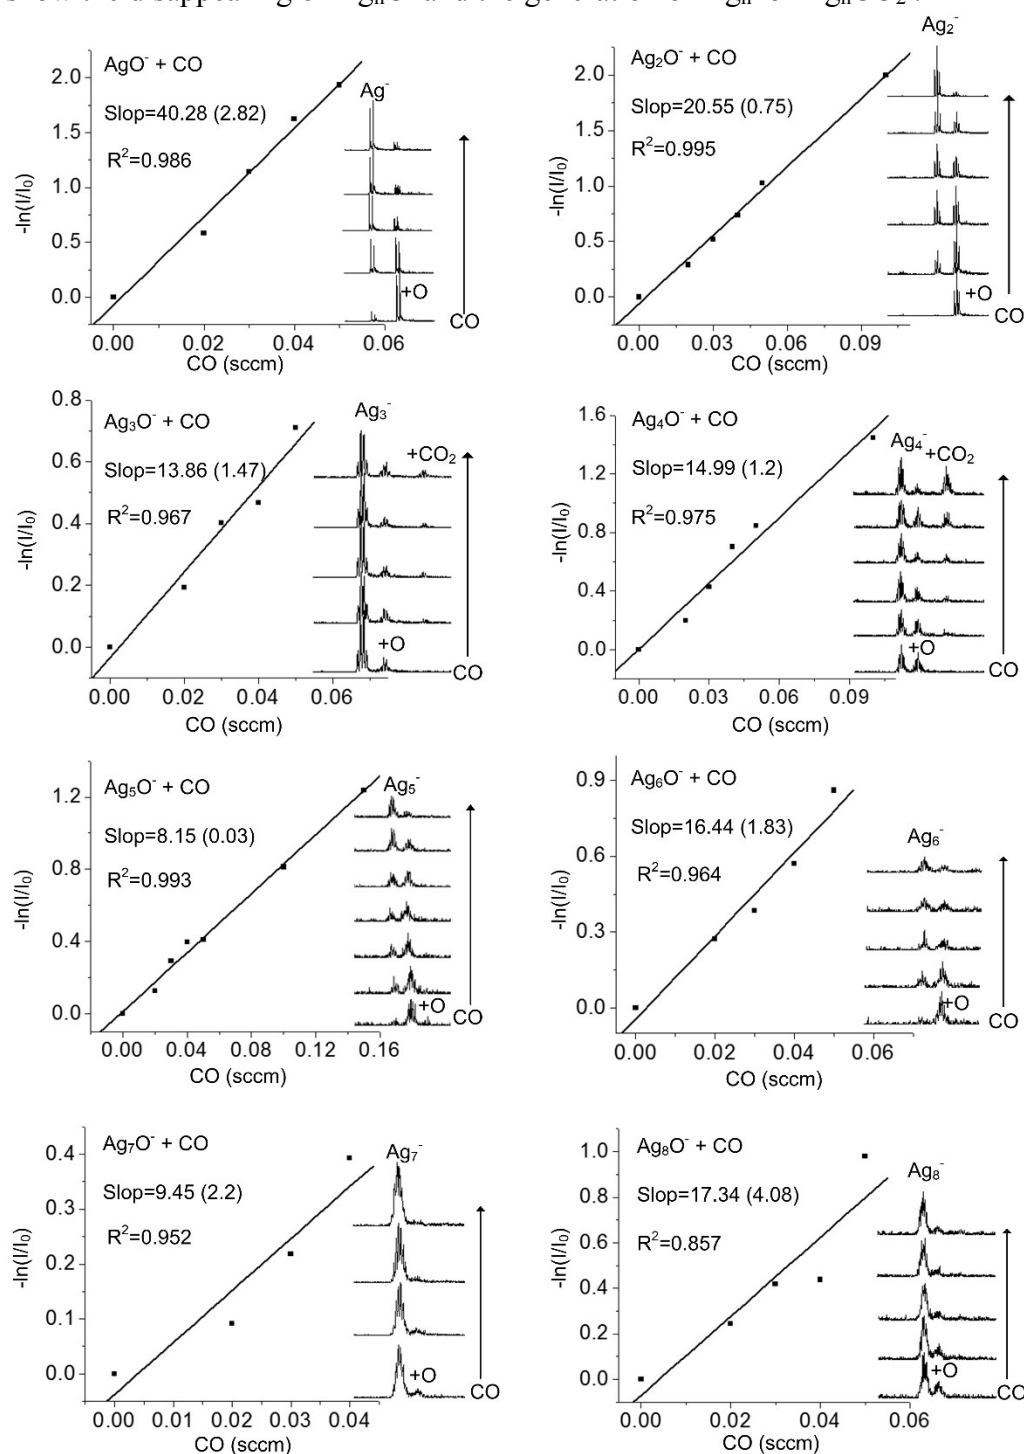

Fig. S2 The lower lying structural candidates of  $\text{Ag}_n\text{O}^-$  ( $n = 1-8$ ) optimized by B3LYP method with the Aug-cc-pvtz-pp basis set for Ag and the 6-311g\* basis sets for C and O. The  $\text{Ag}_n\text{O}^-$  ( $n = 1, 3, 5, 7$ ) are at their singlet states, and the  $\text{Ag}_n\text{O}^-$  ( $n = 2, 4, 6, 8$ ) are at their doublet states. The numerals show their relative energies in eV.

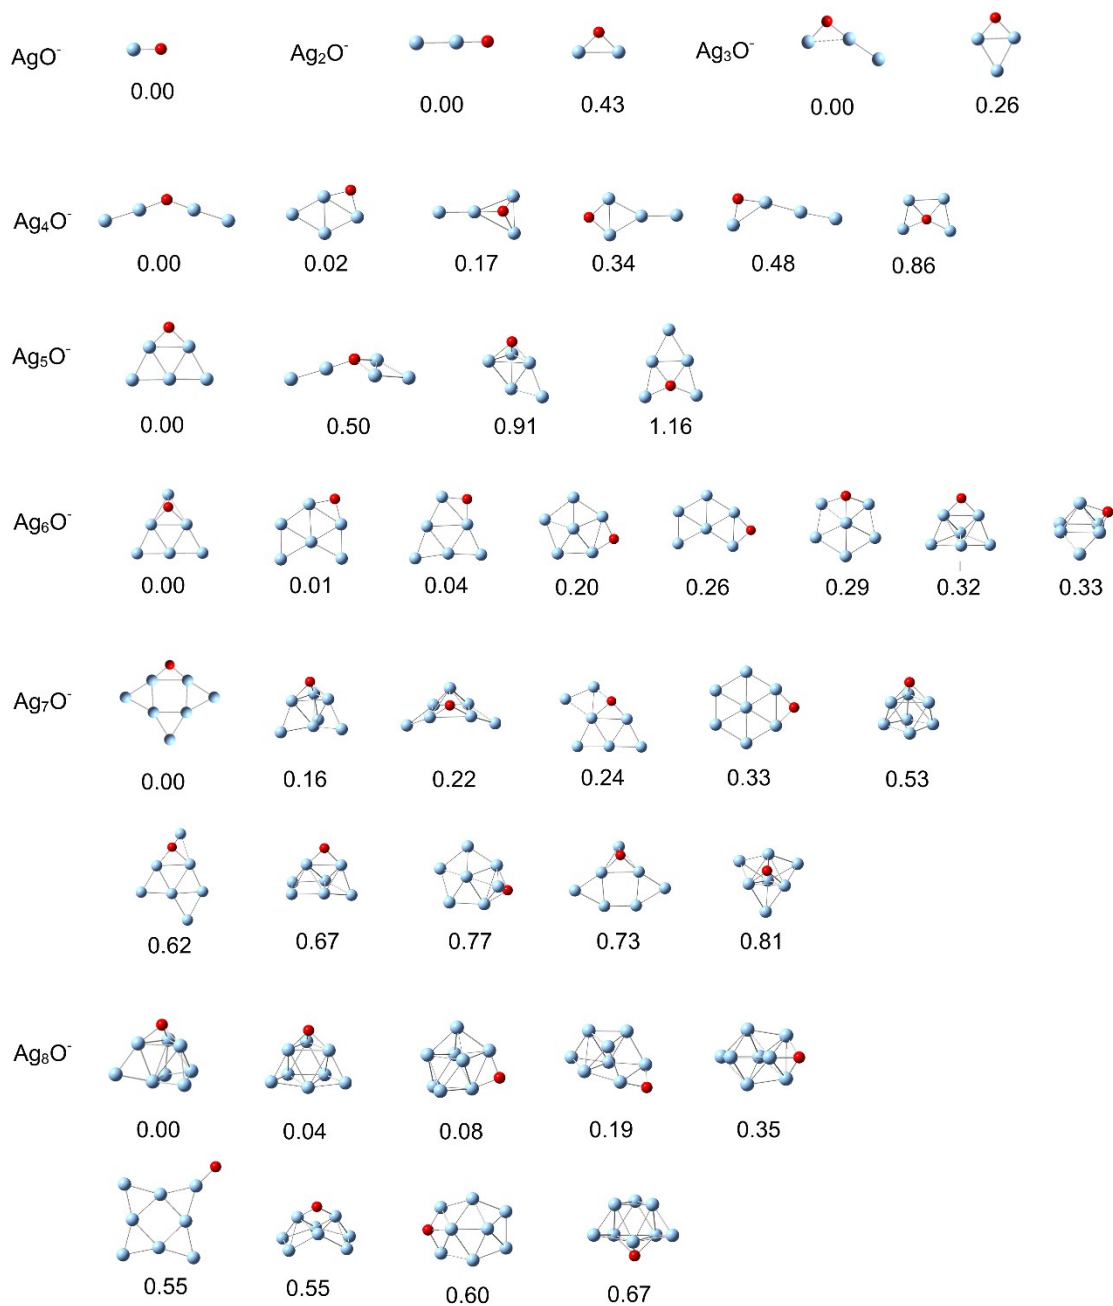

Fig. S3 The spins and negative charges (in a.u.) on the oxygen atoms in the lowest lying structures of  $\text{Ag}_n\text{O}^-$  ( $n = 1-8$ ) from the natural bond orbital (NBO) analysis.

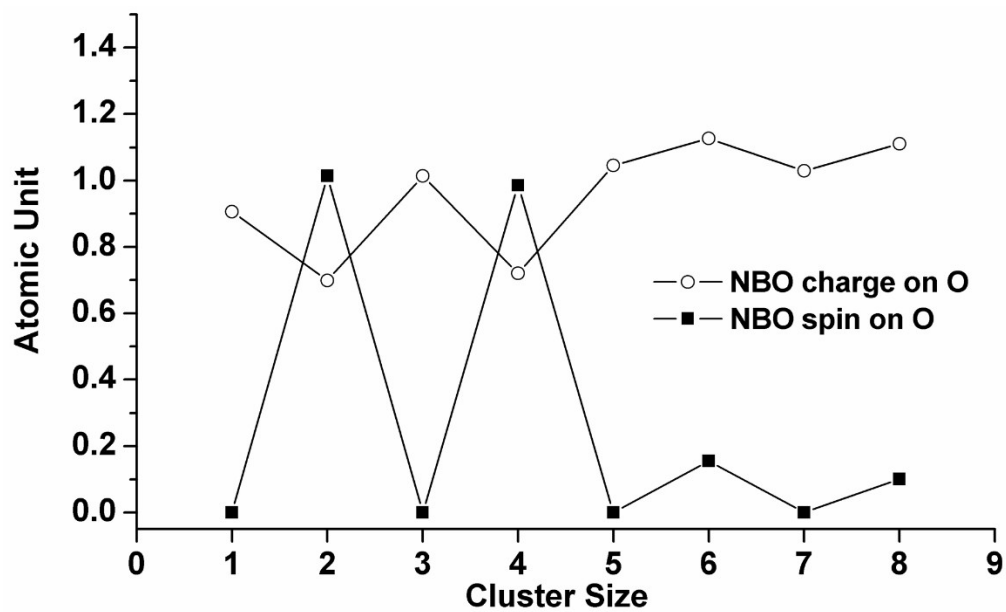

Fig. S4 Theoretical structures of  $\text{Ag}_n\text{CO}_2^-$  ( $n = 1-8$ ) with  $\text{CO}_2$  molecularly bonded on the  $\text{Ag}_n^-$  frames of the lowest lying  $\text{Ag}_n\text{O}^-$  ( $n = 1, 2, 5-8$ ) and the lowest lying structures of  $\text{Ag}_3^-$  and  $\text{Ag}_4^-$ . The  $E_b$  values [ $=E(\text{Ag}_n^-) + E(\text{CO}_2) - E(\text{Ag}_n\text{CO}_2^-)$ ], indicate  $\text{CO}_2$  binding energies in eV. All structures and energies were obtained using B3LYP method with the Aug-cc-pvtz-pp basis set for Ag and the 6-311g\* basis sets for C and O. The  $\text{Ag}_n\text{CO}_2^-$  ( $n = 1, 3, 5, 7$ ) are at their singlet states, and the  $\text{Ag}_n\text{CO}_2^-$  ( $n = 2, 4, 6, 8$ ) are at their doublet states. For  $\text{Ag}_4\text{CO}_2^-$ , the  $\text{CO}_2$  binding strength is too weak to locate a minimum structure at the present theoretical level.

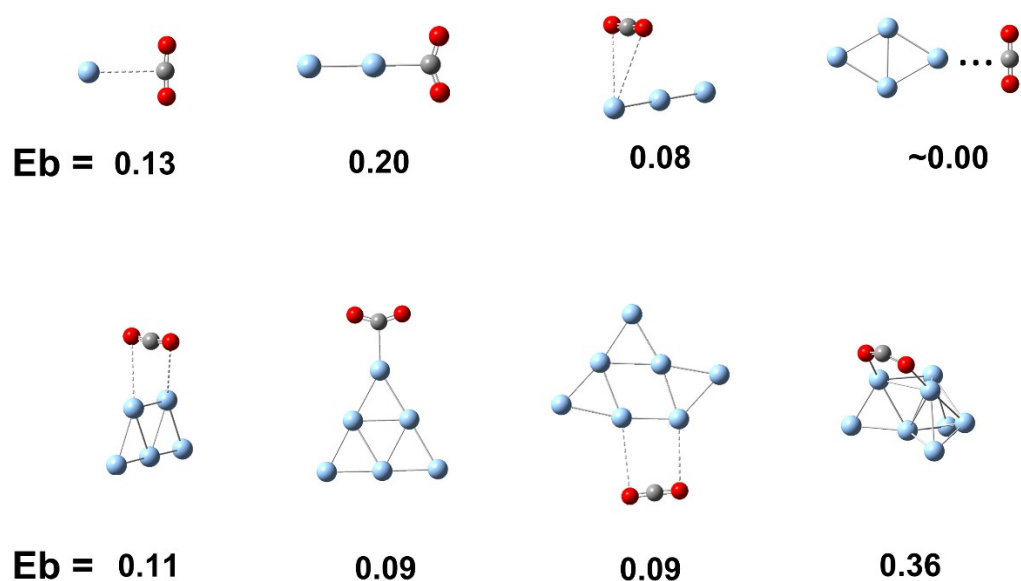

Fig. S5 Structural candidates for  $\text{Ag}_n\text{CO}_2^-$  ( $n = 3$  and 4) except those with weakly bonded  $\text{CO}_2$ . The  $\Delta E$  values indicate the energies (in eV) of these structures relative to those of  $\text{Ag}_3\text{CO}_2^-$  or  $\text{Ag}_4\text{CO}_2^-$  in Fig. S4. All structures and energies were obtained using B3LYP method with the Aug-cc-pvtz-pp basis set for Ag and the 6-311g\* basis sets for C and O.

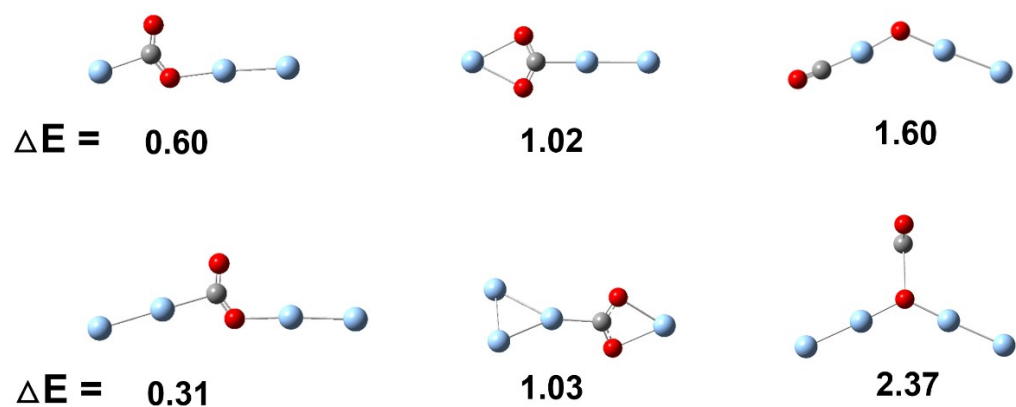

Supplement: c6cp06741g1.pdf [file c6cp06741g1.pdf]
